# Supplementary material for: Change in diazotrophic community structure associated with Kuroshio succession in the northern South China Sea
Source: Copernicus journal article supplement (doi:10.5194/bg-2023-126), 2023-08-31
Supplement: Supplementary file 1 [file bg-2023-126-supplement.pdf]

1 *Supplement of*

2 **Change in diazotrophic community structure associated with**  
3 **Kuroshio succession in the northern South China Sea**

4 Han Zhang et al.

5 *Correspondence to:* Tuo Shi (tuoshi@sdu.edu.cn)

6

7 This file includes:

8       Figure S1

9       Tables S1 to S8

10       References for supplement

11 The copyright of individual parts of the supplement might differ from the article license.

12

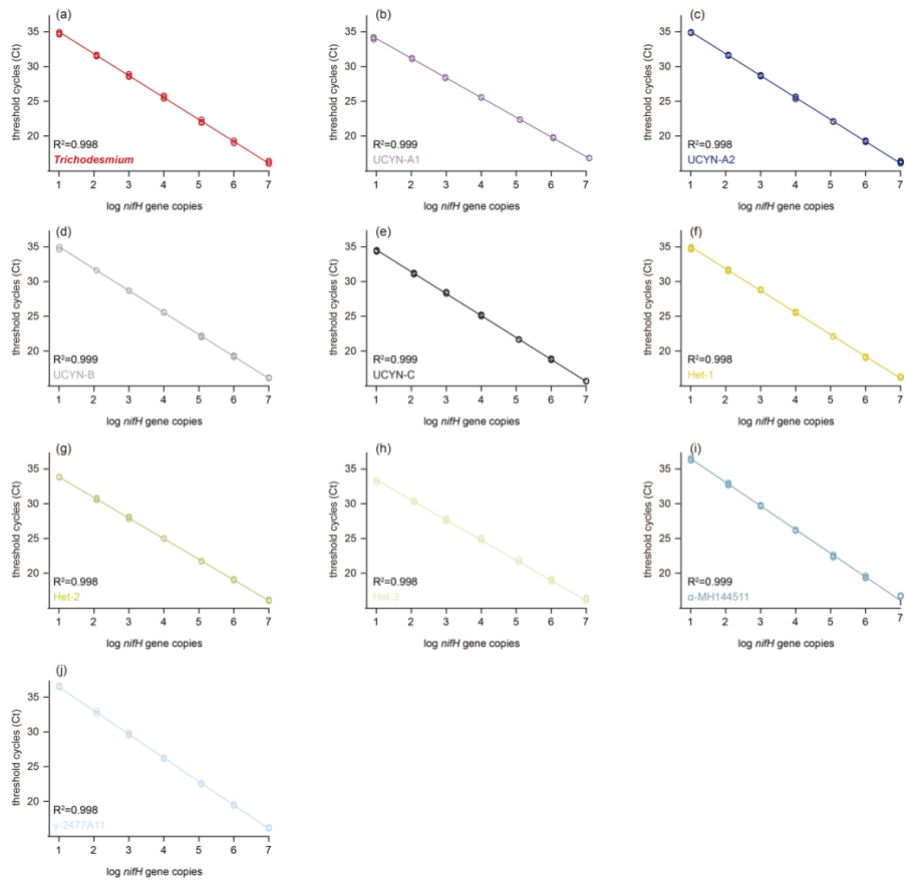

13

14 Figure S1. Representative standard curves for qPCR. (a) *Trichodesmium*; (b) UCYN-A1; (c) UCYN-A2; (d) UCYN-B;

15 (e) UCYN-C; (f) Het-1; (g) Het-2; (h) Het-3; (i)  $\alpha$ -MH144511; (j)  $\gamma$ -24774A11.

16

17 Table S1. Sampling information.

| Station <sup>a)</sup> | Location            | Sampling time (yyyy/mm/dd) | Sampling depth (m) <sup>b)</sup> |
|-----------------------|---------------------|----------------------------|----------------------------------|
| stn1                  | 123.023°E, 22.016°N | 2017/07/14                 | 5; 25; 50; 75; 100; 115          |
| stn4*                 | 119.500°E, 21.000°N | 2017/07/19                 | 5; 25; 50; 75; 100; 115          |
| stn9*                 | 116.000°E, 18.000°N | 2017/07/27                 | 5; 25; 50; 85; 100; 150          |
| stn11                 | 115.432°E, 16.550°N | 2017/08/01                 | 5; 25; 55; 75; 100; 150          |
| stn12                 | 114.789°E, 15.154°N | 2017/08/04                 | 5; 25; 50; 60; 100; 150          |
| stn2                  | 122.500°E, 22.000°N | 2018/06/27                 | 5; 50; 75; 100; 150              |
| stn3                  | 122.500°E, 21.500°N | 2018/06/25                 | 5; 25; 75; 100; 150              |
| stn4*                 | 119.500°E, 21.000°N | 2018/06/22                 | 5; 25; 75; 100; 150              |
| stn5                  | 119.000°E, 20.500°N | 2018/06/21                 | 5; 25; 75; 100; 150              |
| stn6                  | 118.400°E, 20.000°N | 2018/06/22                 | 5; 25; 75; 100; 150              |
| stn7                  | 117.980°E, 19.500°N | 2018/06/30                 | 5; 25; 75; 100; 150              |
| stn8                  | 117.000°E, 19.000°N | 2018/07/03                 | 5; 25; 75; 100; 150              |
| stn9*                 | 116.000°E, 18.000°N | 2018/07/05                 | 5; 25; 75; 100; 150              |
| stn10                 | 115.000°E, 17.000°N | 2018/07/07                 | 5; 25; 75; 100; 150              |

18 Note: a) The same stations sampled in both 2017 and 2018 are marked with an asterisk (\*). b) Samples collected at the 5  
19 m water depth were used for qPCR and NGS.

20 Table S2. GenBank accession numbers of sequence standards used to target specific N<sub>2</sub>-fixing taxa.  
21

| Species              | Accession | Reference              |
|----------------------|-----------|------------------------|
| UCYN-A1              | AF059627  | Zehr et al., 1998      |
| UCYN-A2              | KF806604  | Thompson et al., 2014  |
| UCYN-B               | AF299418  | Zehr et al., 2001      |
| Het-1                | DQ118191  | Church et al., 2005b   |
| Het-2                | DQ225754  | Foster and Zehr, 2006  |
| Het-3                | DQ225762  | Foster and Zehr, 2006  |
| $\alpha$ -MH144511   | MH144511  | Chen et al., 2019      |
| $\gamma$ -24774A11   | EU052318  | Moisander et al., 2008 |
| UCYN-C               | HQ455916  | This study             |
| <i>Trichodesmium</i> | L00689    | This study             |

Table S3. Oligonucleotide primer and probe sequences utilized for TaqMan qPCR.

| Species              | Forward (5'→3')                 | Probe (5'→3')                        | Reverse (5'→3')                    | Reference              |
|----------------------|---------------------------------|--------------------------------------|------------------------------------|------------------------|
| <i>Trichodesmium</i> | GACGAAGTATTGAAGCCAGGTTT<br>C    | CATTAAGTGTGTTGAATCTGGTG<br>GTCCTGAGC | CGGCCAGCGCAACCTA                   | Church et al., 2005b   |
| UCYN-A1              | TAGCTGCAGAAAGAGGAACTGT<br>AGAAG | TAATTCCTGGCTATAACAAC                 | TCAGGACCACCGGACTCAAC               | Langlois et al., 2008  |
| UCYN-A2              | GGTTACAACAACGTTTTATGTGT<br>TGA  | TCTGGTGGTCCTGAGCCCGGA                | ACCACGACCAGCACATCCA                | Thompson et al., 2014  |
| UCYN-B               | CGTAATGCTCGAAGGGTTTGA           | CAAGTGTGTAGAATCTGGTGGTC<br>CTGAGCC   | CACGACCAGCACAACTCAACT              | Moisander et al., 2010 |
| UCYN-C               | TCTACCCGTTTGATGCTACACAC<br>TAA  | AAACTACCATTCTTCACTTAGCA<br>G         | GGTATCCTTCAAGTAGTACTTCG<br>TCTAGCT | Langlois et al., 2008  |
| Het-1                | CGGTTTCCGTGGTGTACGTT            | TCCGGTGGTCCTGAGCCTGGTGT              | AATACCACGACCCGCACAAC               | Church et al., 2005b   |
| Het-2                | TGGTTACCGTGATGTACGTT            | TCTGGTGGTCCTGAGCCTGGTGT              | AATGCCGCGACCAGCACACAAC             | Moisander et al., 2010 |
| Het-3                | CGGTTTCCGTGGCGTACGTT            | TCCGGTGGTCCAGAACCTGGTGT              | AATACCACGACCAGCACACAAC             | Foster et al., 2007    |
| $\alpha$ -MH144511   | ACGGCGCCTACGAGGATATCGAT<br>T    | ACGTGCTGGGCGACGTTGTCTGC              | CTGCGCCTTGTTCTCGCGGAT              | Chen et al., 2019      |
| $\gamma$ -24774A11   | CGGTAGAGGATCTTGAGCTTGAA         | AAGTGCTTAAGGTTGGCTTTGGC<br>GACA      | CACCTGACTCCACGCACTTG               | Moisander et al., 2008 |

25 Table S4. Summary of environmental factors detected in this study.

| Year | Station <sup>a)</sup> | SST<br>(°C) | SSS   | MLD<br>(m) | DCM<br>(m) | Nit<br>(m) | I <sub>DIN</sub><br>(mmol m <sup>-2</sup> ) | I <sub>DIP</sub><br>(mmol m <sup>-2</sup> ) | I <sub>NFR</sub><br>(μmol N m <sup>-2</sup> d <sup>-1</sup> ) | S <sub>NFR</sub><br>(nmol N L <sup>-1</sup> d <sup>-1</sup> ) | I <sub>PP</sub><br>(mmol C m <sup>-2</sup> d <sup>-1</sup> ) | S <sub>PP</sub><br>(μmol C L <sup>-1</sup> d <sup>-1</sup> ) | R <sub>K_100</sub><br>(%) |
|------|-----------------------|-------------|-------|------------|------------|------------|---------------------------------------------|---------------------------------------------|---------------------------------------------------------------|---------------------------------------------------------------|--------------------------------------------------------------|--------------------------------------------------------------|---------------------------|
| 2017 | stn1                  | 30.81       | 34.59 | 40         | 137        | ND         | ND                                          | ND                                          | 271.88                                                        | 0.90                                                          | 4.67                                                         | 0.06                                                         | 100.00                    |
| 2017 | stn4*                 | 29.95       | 33.85 | 37         | 98         | ND         | ND                                          | ND                                          | 86.40                                                         | 0.71                                                          | 21.11                                                        | 0.24                                                         | 82.01                     |
| 2017 | stn9*                 | 29.71       | 33.60 | 34         | 69         | ND         | ND                                          | ND                                          | 129.81                                                        | 0.11                                                          | 18.09                                                        | 0.29                                                         | 11.81                     |
| 2017 | stn11                 | 27.96       | 33.64 | 32         | 63         | ND         | ND                                          | ND                                          | 11.73                                                         | 0.25                                                          | 20.87                                                        | 0.23                                                         | 28.34                     |
| 2017 | stn12                 | 29.20       | 33.43 | 22         | 63         | ND         | ND                                          | ND                                          | 27.27                                                         | 0.39                                                          | 27.7                                                         | 0.26                                                         | 5.89                      |
| 2018 | stn2                  | 29.12       | 34.45 | 44         | 102        | 114        | 10.50                                       | 8.40                                        | 52.00                                                         | 0.32                                                          | 18.84                                                        | 0.20                                                         | 100.00                    |
| 2018 | stn3                  | 29.17       | 34.51 | 15         | 117        | 131        | 1.00                                        | 8.00                                        | 64.38                                                         | 0.48                                                          | 27.76                                                        | 0.32                                                         | 92.57                     |
| 2018 | stn4*                 | 28.87       | 33.66 | 21         | 44         | ND         | ND                                          | 16.52                                       | 77.95                                                         | 0.96                                                          | 90.00                                                        | 0.61                                                         | 11.01                     |
| 2018 | stn5                  | 28.59       | 33.30 | 36         | 52         | ND         | ND                                          | 19.41                                       | 86.82                                                         | 1.57                                                          | 121.16                                                       | 0.43                                                         | 5.83                      |
| 2018 | stn6                  | 29.35       | 33.46 | 22         | 64         | 26         | 25.00                                       | 179.50                                      | 52.19                                                         | 1.17                                                          | 27.11                                                        | 0.52                                                         | 6.23                      |
| 2018 | stn7                  | 29.50       | 33.78 | 40         | 83         | 50         | 28.00                                       | 230.11                                      | 56.49                                                         | 1.75                                                          | 19.39                                                        | 0.20                                                         | 3.75                      |
| 2018 | stn8                  | 29.20       | 33.84 | 27         | 78         | 50         | 272.23                                      | 23.38                                       | 105.90                                                        | 1.38                                                          | 26.89                                                        | 0.31                                                         | 0.44                      |
| 2018 | stn9*                 | 29.55       | 33.81 | 31         | 71         | 44         | 177.42                                      | 17.21                                       | 94.03                                                         | 1.41                                                          | 21.09                                                        | 0.30                                                         | 0.00                      |
| 2018 | stn10                 | 30.24       | 33.45 | 27         | 82         | 56         | 95.80                                       | 12.18                                       | 93.61                                                         | 2.86                                                          | 31.55                                                        | 0.51                                                         | 0.00                      |

26 Note: a) The same stations sampled in both 2017 and 2018 are marked with an asterisk (\*). Abbreviations: SST, sea surface temperature; SSS, sea surface salinity; MLD, mixed  
 27 layer depth; DCM, depth of chlorophyll maximum; Nit, depth of nitracline; I<sub>DIN</sub>, depth-integrated dissolved inorganic nitrogen; I<sub>DIP</sub>, depth-integrated dissolved inorganic  
 28 phosphorus; S<sub>NFR</sub>, surface N<sub>2</sub> fixation rate; I<sub>PP</sub>, depth-integrated primary production; S<sub>PP</sub>, surface primary production; R<sub>K\_100</sub>, averaged Kuroshio fractions in the upper 100 m;  
 29 ND, not determined.

30

31

32 Table S5. The abundance of the ten major diazotrophic groups determined based on TaqMan qPCR assay of the *nifH* gene (copies L<sup>-1</sup>).

| Year | Station <sup>a)</sup> | Time (hh: mm) | <i>Trichodesmium</i> | UCYN-A1            | UCYN-A2            | UCYN-B             | UCYN-C             | Het-1              | Het-2              | Het-3              | $\alpha$ -MH144511 | $\gamma$ -2477A11  |
|------|-----------------------|---------------|----------------------|--------------------|--------------------|--------------------|--------------------|--------------------|--------------------|--------------------|--------------------|--------------------|
| 2017 | stn1                  | 10: 00        | $5.79 \times 10^5$   | $4.82 \times 10^2$ | $3.00 \times 10^3$ | $8.31 \times 10^4$ | $3.70 \times 10^2$ | $1.32 \times 10^4$ | BDL                | $9.37 \times 10^2$ | $8.84 \times 10^4$ | $1.44 \times 10^4$ |
| 2017 | stn1                  | 19: 00        | $4.00 \times 10^4$   | $2.07 \times 10^4$ | $1.44 \times 10^3$ | $2.31 \times 10^6$ | $3.19 \times 10^3$ | $4.31 \times 10^2$ | BDL                | BDL                | $4.67 \times 10^4$ | $2.44 \times 10^4$ |
| 2017 | stn4*                 | 13: 00        | $1.28 \times 10^6$   | $6.32 \times 10^4$ | $1.83 \times 10^3$ | $3.31 \times 10^6$ | $6.34 \times 10^3$ | $2.00 \times 10^4$ | BDL                | BDL                | $2.46 \times 10^5$ | $2.97 \times 10^4$ |
| 2017 | stn4*                 | 19: 00        | $1.63 \times 10^5$   | $1.81 \times 10^4$ | $2.35 \times 10^3$ | $3.61 \times 10^4$ | $1.39 \times 10^4$ | $2.37 \times 10^2$ | $2.95 \times 10^2$ | BDL                | $3.85 \times 10^5$ | $1.94 \times 10^4$ |
| 2017 | stn9*                 | 10: 00        | $5.47 \times 10^5$   | $5.69 \times 10^4$ | $5.72 \times 10^2$ | $1.59 \times 10^6$ | $8.53 \times 10^3$ | $1.06 \times 10^3$ | BDL                | $3.85 \times 10^4$ | $7.47 \times 10^4$ | $5.18 \times 10^4$ |
| 2017 | stn9*                 | 19: 30        | $6.19 \times 10^4$   | $4.50 \times 10^4$ | $1.96 \times 10^3$ | $4.18 \times 10^4$ | $3.78 \times 10^3$ | $1.05 \times 10^2$ | BDL                | $9.04 \times 10^3$ | $1.17 \times 10^4$ | $7.78 \times 10^3$ |
| 2017 | stn11                 | 15: 00        | $3.78 \times 10^6$   | $4.80 \times 10^4$ | $2.47 \times 10^4$ | $3.10 \times 10^6$ | $9.20 \times 10^3$ | $9.38 \times 10^2$ | $4.54 \times 10^2$ | $6.71 \times 10^3$ | $5.49 \times 10^5$ | $1.09 \times 10^4$ |
| 2017 | stn11                 | 20: 30        | $6.29 \times 10^4$   | $9.61 \times 10^5$ | $1.71 \times 10^4$ | $2.39 \times 10^5$ | $2.21 \times 10^4$ | $9.58 \times 10^2$ | BDL                | $4.93 \times 10^3$ | $7.80 \times 10^4$ | $3.58 \times 10^3$ |
| 2017 | stn12                 | 13: 00        | $5.47 \times 10^5$   | $1.28 \times 10^3$ | $1.49 \times 10^3$ | $3.17 \times 10^3$ | $4.80 \times 10^3$ | $3.98 \times 10^2$ | BDL                | $4.47 \times 10^2$ | $1.77 \times 10^4$ | $2.15 \times 10^4$ |
| 2017 | stn12                 | 20: 00        | $7.62 \times 10^4$   | $2.30 \times 10^3$ | $3.34 \times 10^3$ | $4.15 \times 10^4$ | $5.22 \times 10^3$ | $1.16 \times 10^4$ | BDL                | $1.67 \times 10^3$ | $1.58 \times 10^4$ | $8.40 \times 10^3$ |
| 2018 | stn2                  | 13: 30        | $1.04 \times 10^3$   | $3.40 \times 10^3$ | $5.62 \times 10^2$ | $1.08 \times 10^4$ | $2.18 \times 10^2$ | $4.87 \times 10^2$ | $1.01 \times 10^2$ | $1.53 \times 10^2$ | $1.04 \times 10^2$ | $2.29 \times 10^2$ |
| 2018 | stn2                  | 03: 00        | BDL                  | $2.59 \times 10^3$ | $5.63 \times 10^2$ | $1.11 \times 10^3$ | $8.79 \times 10^2$ | BDL                | $1.25 \times 10^2$ | $3.40 \times 10^2$ | $1.26 \times 10^2$ | $2.36 \times 10^2$ |
| 2018 | stn3                  | 15: 30        | $1.35 \times 10^5$   | $1.74 \times 10^2$ | $1.87 \times 10^2$ | $8.88 \times 10^3$ | $5.31 \times 10^2$ | $2.56 \times 10^3$ | $1.01 \times 10^2$ | $1.92 \times 10^2$ | BDL                | BDL                |
| 2018 | stn3                  | 19: 00        | $1.66 \times 10^2$   | $8.99 \times 10^2$ | $3.34 \times 10^3$ | $6.22 \times 10^5$ | $2.25 \times 10^3$ | $2.39 \times 10^2$ | $2.41 \times 10^2$ | $1.25 \times 10^2$ | $2.94 \times 10^2$ | $7.06 \times 10^2$ |
| 2018 | stn4*                 | 15: 00        | $5.24 \times 10^3$   | $1.60 \times 10^2$ | $1.44 \times 10^2$ | $2.55 \times 10^4$ | $6.27 \times 10^2$ | $9.20 \times 10^1$ | BDL                | BDL                | BDL                | BDL                |
| 2018 | stn4*                 | 20: 00        | BDL                  | $7.58 \times 10^2$ | $5.60 \times 10^3$ | $5.11 \times 10^5$ | BDL                | BDL                | $1.25 \times 10^2$ | $3.40 \times 10^2$ | $1.26 \times 10^2$ | $4.36 \times 10^2$ |
| 2018 | stn7                  | 10: 40        | $5.81 \times 10^4$   | $2.76 \times 10^3$ | $2.58 \times 10^3$ | $1.45 \times 10^5$ | $1.89 \times 10^3$ | $2.38 \times 10^2$ | $1.48 \times 10^2$ | BDL                | BDL                | BDL                |
| 2018 | stn7                  | 03: 00        | $7.47 \times 10^2$   | $2.46 \times 10^3$ | $5.61 \times 10^3$ | $1.10 \times 10^7$ | $3.31 \times 10^3$ | $7.65 \times 10^3$ | $4.43 \times 10^3$ | $2.81 \times 10^3$ | $1.23 \times 10^3$ | $1.28 \times 10^3$ |
| 2018 | stn9*                 | 14: 30        | $5.24 \times 10^3$   | $5.80 \times 10^2$ | $5.44 \times 10^2$ | $1.22 \times 10^5$ | $1.05 \times 10^3$ | $3.19 \times 10^2$ | BDL                | $5.39 \times 10^2$ | $1.62 \times 10^2$ | $3.85 \times 10^2$ |
| 2018 | stn9*                 | 20: 00        | $2.81 \times 10^3$   | $1.55 \times 10^3$ | $5.08 \times 10^3$ | $5.55 \times 10^5$ | $8.70 \times 10^2$ | $2.03 \times 10^3$ | $5.06 \times 10^2$ | $1.55 \times 10^3$ | $1.23 \times 10^3$ | $1.79 \times 10^3$ |

33 Note: a) The same stations sampled in both 2017 and 2018 are marked with an asterisk (\*). BDL, below detection limit.

34

35

36 Table S6. The number of OTUs corresponding to various diazotrophic lineages at designated stations as detected via NGS.

| Station <sup>a)</sup><br>Taxonomy | 2017  |       |       |       |       | 2018  |       |       |       |       |       |       |       |       |
|-----------------------------------|-------|-------|-------|-------|-------|-------|-------|-------|-------|-------|-------|-------|-------|-------|
|                                   | stn1  | stn4* | stn9* | stn11 | stn12 | stn2  | stn3  | stn4* | stn5  | stn6  | stn7  | stn8  | stn9* | stn10 |
| <i>Trichodesmium</i>              | 26910 | 16480 | 10983 | 5567  | 6050  | 19142 | 13541 | 12310 | 4542  | 6816  | 5644  | 13222 | 5683  | 5139  |
| UCYN-A                            | 0     | 26    | 0     | 7     | 4     | 336   | 252   | 5     | 566   | 259   | 123   | 772   | 1     | 1     |
| UCYN-B                            | 4345  | 797   | 3398  | 28    | 7473  | 5214  | 7267  | 18765 | 9276  | 10029 | 13139 | 10282 | 13459 | 17818 |
| UCYN-C                            | 234   | 1     | 0     | 24599 | 0     | 0     | 7     | 3     | 3     | 27    | 17    | 6     | 3     | 5     |
| Other Cyanobacteria               | 42    | 391   | 21    | 64    | 45    | 570   | 414   | 12    | 33    | 8     | 1942  | 223   | 575   | 261   |
| $\alpha$ -proteobacteria          | 0     | 0     | 0     | 0     | 0     | 64    | 37    | 10    | 2     | 0     | 0     | 48    | 46    | 27    |
| $\beta$ -proteobacteria           | 0     | 0     | 0     | 0     | 0     | 99    | 195   | 1     | 2     | 0     | 377   | 32    | 455   | 105   |
| $\gamma$ -proteobacteria          | 4539  | 9339  | 18059 | 4254  | 22889 | 7451  | 9479  | 1051  | 13529 | 10161 | 7521  | 6199  | 7356  | 6157  |
| $\delta$ -proteobacteria          | 0     | 0     | 0     | 0     | 0     | 5     | 2     | 4     | 0     | 8     | 1     | 0     | 0     | 8     |
| Other Proteobacteria              | 31    | 1618  | 55    | 1414  | 46    | 0     | 0     | 0     | 0     | 0     | 0     | 0     | 0     | 0     |
| Actinobacteria                    | 0     | 0     | 0     | 258   | 0     | 0     | 0     | 0     | 0     | 0     | 0     | 0     | 0     | 0     |
| Archaea                           | 0     | 0     | 0     | 1     | 0     | 0     | 0     | 0     | 0     | 0     | 0     | 0     | 0     | 0     |
| Bacteroidetes                     | 0     | 247   | 1     | 0     | 0     | 0     | 0     | 0     | 0     | 0     | 0     | 0     | 0     | 0     |
| Firmicutes                        | 9     | 168   | 0     | 194   | 6     | 0     | 12    | 0     | 0     | 0     | 16    | 6     | 0     | 0     |
| Planctomycetes                    | 7     | 0     | 0     | 43    | 0     | 0     | 0     | 0     | 0     | 0     | 0     | 0     | 0     | 0     |
| Spirochaetes                      | 0     | 26    | 0     | 0     | 0     | 0     | 0     | 0     | 0     | 0     | 0     | 0     | 0     | 0     |
| Verrucomicrobia                   | 0     | 0     | 0     | 49    | 4     | 170   | 20    | 84    | 52    | 3     | 2812  | 206   | 447   | 130   |
| Others                            | 402   | 7426  | 4002  | 41    | 2     | 526   | 2351  | 1332  | 5572  | 6266  | 1985  | 2581  | 5552  | 3926  |

Note: The same stations sampled in both 2017 and 2018 are marked with an asterisk (\*).

37  
38

39

40 Table S7. The number and proportion (in brackets) of OTUs corresponding to specific diazotrophic subcommunities as  
 41 detected via NGS with a 97% sequence similarity cutoff.

| Diazotrophic subcommunities         | OTU number  |            |
|-------------------------------------|-------------|------------|
|                                     | 2017        | 2018       |
| All OTUs                            | 360         | 114        |
| Abundant taxa                       | 0           | 1 (0.9%)   |
| Conditionally abundant taxa         | 5 (1.4%)    | 3 (2.6%)   |
| Moderate taxa                       | 0           | 0          |
| Rare taxa                           | 32 (8.9%)   | 11 (9.6%)  |
| Conditionally rare taxa             | 290 (80.6%) | 77 (67.5%) |
| Conditionally rare or abundant taxa | 33 (9.2%)   | 22 (19.3%) |

42  
 43 Table S8. Mantel's tests of correlations of geographical distance, environmental distance, and individual environmental  
 44 factors with the diazotrophic subcommunities.

| Sampling time | Factors      | All    |        | AT+CAT+CRAT |       | RT     |        | CRT    |       |
|---------------|--------------|--------|--------|-------------|-------|--------|--------|--------|-------|
|               |              | r      | P      | r           | P     | r      | P      | r      | P     |
| 2017          | Geo          | 0.058  | 0.255  | 0.251       | 0.002 | -0.039 | 0.651  | -0.032 | 0.65  |
|               | Env          | 0.378  | 0.001  | 0.428       | 0.001 | 0.228  | 0.015  | 0.392  | 0.001 |
|               | Stat_depth   | 0.348  | 0.001  | 0.348       | 0.001 | 0.161  | 0.007  | 0.256  | 0.012 |
|               | Samp_depth   | 0.135  | 0.065  | 0.132       | 0.064 | 0.123  | 0.113  | 0.272  | 0.004 |
|               | Temp         | 0.356  | 0.001  | 0.351       | 0.001 | 0.135  | 0.081  | 0.309  | 0.001 |
|               | DO           | 0.040  | 0.310  | 0.044       | 0.290 | 0.012  | 0.441  | 0.039  | 0.299 |
|               | Sal          | 0.428  | 0.002  | 0.425       | 0.001 | 0.178  | 0.036  | 0.376  | 0.001 |
|               | MLD          | 0.426  | 0.001  | 0.421       | 0.001 | 0.210  | 0.022  | 0.422  | 0.001 |
|               | Chl <i>a</i> | 0.405  | 0.001  | 0.398       | 0.002 | 0.201  | 0.023  | 0.417  | 0.001 |
|               | SSW          | 0.012  | 0.347  | 0.008       | 0.405 | 0.102  | 0.158  | 0.175  | 0.014 |
| 2018          | Geo          | 0.054  | 0.376  | 0.050       | 0.386 | NA     | NA     | 0.211  | 0.159 |
|               | Env          | -0.060 | 0.648  | -0.060      | 0.638 | NA     | NA     | -0.166 | 0.851 |
|               | Stat_depth   | -0.036 | 0.539  | -0.038      | 0.586 | NA     | NA     | -0.096 | 0.727 |
|               | Temp         | 0.050  | 0.384  | 0.050       | 0.379 | NA     | NA     | 0.069  | 0.397 |
|               | DO           | 0.008  | -0.450 | 0.009       | 0.444 | NA     | NA     | -0.078 | 0.695 |
|               | Sal          | 0.025  | 0.395  | 0.024       | 0.405 | NA     | NA     | 0.273  | 0.059 |
|               | MLD          | -0.133 | 0.828  | -0.135      | 0.85  | NA     | NA     | 0.136  | 0.178 |
|               | Chl <i>a</i> | 0.461  | 0.003  | 0.460       | 0.004 | NA     | NA     | 0.136  | 0.174 |
| SSW           | -0.061       | 0.650  | -0.064 | 0.641       | NA    | NA     | -0.121 | 0.782  |       |

45 Abbreviations: Geo, geographical distance; Env, environmental distance; Stat\_depth, station depth; Samp\_depth,  
 46 sampling depth; Temp, temperature; Sal, salinity; MLD, mixed layer depth; Chl *a*, Chlorophyll *a*; DO, dissolved oxygen;  
 47 SSW, sea surface wind. All, all taxa; AT, abundant taxa; CAT, conditionally abundant taxa; CRAT, conditionally rare and  
 48 abundant taxa; CRT, conditionally rare taxa; RT, rare taxa. NA, not applicable.

49  
 50



51 **References**

52

53 Chen, M., Lu, Y., Jiao, N., Tian, J., Kao, S. J., and Zhang, Y.: Biogeographic drivers of diazotrophs in the western Pacific  
54 Ocean, *Limnol. Oceanogr.*, 64, 1403-1421, <https://doi.org/10.1002/lno.11123>, 2019.

55 Church, M. J., Jenkins, B. D., Karl, D. M., and Zehr, J. P.: Vertical distributions of nitrogen-fixing phylotypes at Stn ALOHA  
56 in the oligotrophic North Pacific Ocean, *Aquat. Microb. Ecol.*, 38, 3-14, <https://doi.org/10.3354/AME038003>, 2005a.

57 Church, M. J., Short, C. M., Jenkins, B. D., Karl, D. M., and Zehr, J. P.: Temporal patterns of nitrogenase gene (*nifH*)  
58 expression in the oligotrophic North Pacific Ocean, *Appl. Environ. Microb.*, 71, 5362-5370,  
59 <https://doi.org/10.1128/Aem.71.9.5362-5370.2005>, 2005b.

60 Foster, R. A., and Zehr, J. P.: Characterization of diatom-cyanobacteria symbioses on the basis of *nifH*, *hetR* and 16S rRNA  
61 sequences, *Environ. Microb.*, 8, 1913-1925, <https://doi.org/10.1111/j.1462-2920.2006.01068.x>, 2006.

62 Foster, R. A., Subramaniam, A., Mahaffey, C., Carpenter, E. J., Capone, D. G., and Zehr, J. P.: Influence of the Amazon  
63 River plume on distributions of free-living and symbiotic cyanobacteria in the western tropical north Atlantic Ocean,  
64 *Limnol. Oceanogr.*, 52, 517-532, <https://doi.org/10.4319/lo.2007.52.2.0517>, 2007.

65 Langlois, R. J., D. Hummer., and J. LaRoche.: Abundances and distributions of the dominant *nifH* phylotypes in the  
66 Northern Atlantic Ocean. *Appl. Environ. Microbiol.*, 74, 1922-1931. <https://doi.org/10.1128/AEM.01720-07>, 2008.

67 Moisander, P. H., Beinart, R. A., Voss, M., and Zehr, J. P.: Diversity and abundance of diazotrophic microorganisms in the  
68 South China Sea during intermonsoon, *ISME J.*, 2, 954-967, <https://doi.org/10.1038/ismej.2008.51>, 2008.

69 Moisander, P. H., R. A. Beinart, I. Hewson, A. E. White, K. S. Johnson, C. A. Carlson, J. P. Montoya., and J. P. Zehr.:  
70 Unicellular cyanobacterial distributions broaden the oceanic N<sub>2</sub> fixation domain, *Science*, 327, 1512-1514.  
71 <https://doi.org/10.1126/science.1185468>, 2010.

72 Thompson, A., Carter, B. J., Turk-Kubo, K., Malfatti, F., Azam, F., and Zehr, J. P.: Genetic diversity of the unicellular  
73 nitrogen-fixing cyanobacteria UCYN-A and its prymnesiophyte host, *Environ. Microbiol.*, 16, 3238-3249,  
74 <https://doi.org/10.1111/1462-2920.12490>, 2014.

75 Zehr, J. P., Mellon, M. T., and Zani, S.: New nitrogen-fixing microorganisms detected in oligotrophic oceans by  
76 amplification of nitrogenase (*nifH*) genes, *Appl. Environ. Microb.*, 64, 3444-3450,  
77 <https://doi.org/10.1128/AEM.64.12.5067-5067.1998>, 1998.

78 Zehr, J. P., Waterbury, J. B., Turner, P. J., Montoya, J. P., Omoregie, E., Steward, G. F., Hansen, A., and Karl, D. M.:  
79 Unicellular cyanobacteria fix N<sub>2</sub> in the subtropical North Pacific Ocean, *Nature*, 412, 635-638, <https://doi.org/10.1038/35088063>, 2001.

80
